# Supplementary material
Source: PubMed Central journal article supplement (PMC7528297)
Supplement: ao0c02967_si_001.pdf [file ao0c02967_si_001.pdf]

Supporting Information for:

**“Development of pH-Controlled Aluminum-Based Polymeric Gel for Conformance Control in Sour Gas Reservoirs”**

*Mohamed Shamlooh<sup>1</sup>, Ibnelwaleed A. Hussein<sup>1</sup>, Mustafa S. Nasser<sup>1</sup>, Musaab Magzoub<sup>2</sup>, Saeed Salehi<sup>2</sup>*

<sup>1</sup>Gas Processing Center, College of Engineering, PO Box 2713, Qatar University, Doha, Qatar

<sup>2</sup>Department of Petroleum and Geological Engineering, University of Oklahoma, Oklahoma, USA

S1: Illustration on the separation that takes place in the in the colloidal-based gel.

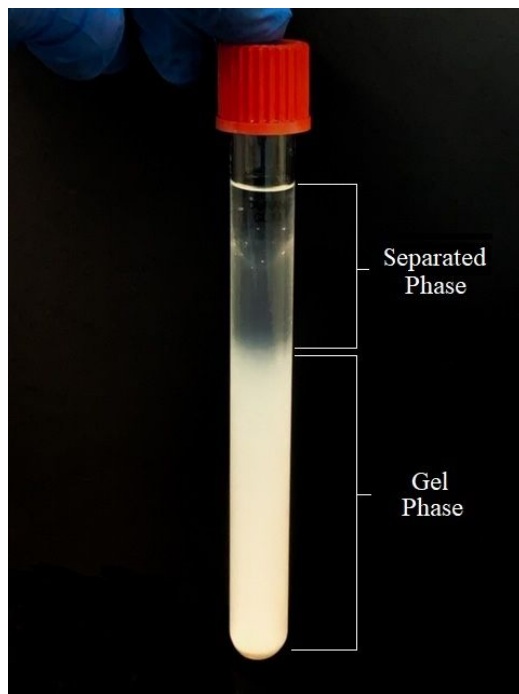

**Figure S1 Separation in the gel sample due to the settling of colloids**
